# Supplementary material for: The MATRICS Consensus Cognitive Battery, Part 2: Co-Norming and Standardization
Source: Atypon-hosted journal article supplement (doi:10.1176/appi.ajp.2007.07010043), 2008-01-03
Supplement: ajp_165_2_214_01.pdf [file ajp_165_2_214_01.pdf]

Contents:

- A. Supplementary Tables
- B. Expanded Results
- References

## A. Supplementary Tables

### Supplementary TABLE 1. Tests Administered to a Community Standardization Sample in Phase 2 of the MATRICS Psychometric and Standardization Study

| Test and Reference Number                                                       | Test Score Used                                                     |
|---------------------------------------------------------------------------------|---------------------------------------------------------------------|
| <b>MATRICS Consensus Cognitive Battery</b>                                      |                                                                     |
| Trail Making Test, Part A (1)                                                   | Time to completion                                                  |
| Brief Assessment of Cognition in Schizophrenia, symbol coding subtest (2)       | Total number correct                                                |
| Hopkins Verbal Learning Test—Revised, immediate recall subtest (3)              | Total number of words recalled correctly over three learning trials |
| Wechsler Memory Scale, 3rd ed., spatial span task (4)                           | Sum of raw scores on forward and backward conditions                |
| Letter-Number Span test (5)                                                     | Number of correct trials                                            |
| Neuropsychological Assessment Battery, mazes subtest (6)                        | Total raw score                                                     |
| Brief Visuospatial Memory Test—Revised (7)                                      | Total recall score over three learning trials                       |
| Category fluency test, animal naming (8)                                        | Total number of animals named in 60 seconds                         |
| Mayer-Salovey-Caruso Emotional Intelligence Test, managing emotions subtest (9) | Branch score using general consensus scoring                        |
| Continuous Performance Test—Identical Pairs version (10)                        | Mean $d'$ value across 2-, 3-, and 4-digit conditions               |
| <b>Supplemental tests</b>                                                       |                                                                     |
| Neuropsychological Assessment Battery, daily living memory subtest (6)          | Total raw score                                                     |
| Brief Assessment of Cognition in Schizophrenia, Tower of London subtest (2)     | Total number correct                                                |
| Neuropsychological Assessment Battery, shape learning subtest (6)               | Total raw score                                                     |

**Supplementary TABLE 2. Test Norms, by Age Group (Non-Transformed Raw Scores)**

| Test                                                                           | Age Group              |      |                        |      |                        |      |
|--------------------------------------------------------------------------------|------------------------|------|------------------------|------|------------------------|------|
|                                                                                | 20–39 years<br>(N=100) |      | 40–49 years<br>(N=100) |      | 50–59 years<br>(N=100) |      |
|                                                                                | Mean                   | SD   | Mean                   | SD   | Mean                   | SD   |
| <b>MATRICES Consensus Cognitive Battery</b>                                    |                        |      |                        |      |                        |      |
| Trail Making Test, Part A                                                      | 24.6                   | 7.7  | 26.5                   | 7.9  | 32.9                   | 11.6 |
| Brief Assessment of Cognition in Schizophrenia,<br>symbol coding subtest       | 62.2                   | 10.4 | 56.0                   | 8.0  | 52.2                   | 11.4 |
| Hopkins Verbal Learning Test—Revised,<br>immediate recall subtest              | 28.0                   | 4.3  | 28.3                   | 4.1  | 26.8                   | 5.2  |
| Wechsler Memory Scale, 3rd ed., spatial span task                              | 17.4                   | 3.0  | 16.1                   | 3.1  | 15.0                   | 3.4  |
| Letter-Number Span test                                                        | 16.3                   | 3.6  | 16.2                   | 2.9  | 15.2                   | 3.3  |
| Neuropsychological Assessment Battery, mazes<br>subtest                        | 21.9                   | 3.9  | 18.1                   | 6.0  | 15.3                   | 6.4  |
| Brief Visuospatial Memory Test—Revised                                         | 27.8                   | 4.8  | 24.6                   | 6.3  | 20.6                   | 7.1  |
| Category fluency test, animal naming                                           | 24.0                   | 5.6  | 23.7                   | 5.1  | 22.0                   | 5.9  |
| Mayer-Salovey-Caruso Emotional Intelligence<br>Test, managing emotions subtest | 95.6                   | 7.9  | 98.7                   | 9.1  | 99.0                   | 9.3  |
| Continuous Performance Test—Identical Pairs<br>version                         | 3.08                   | 0.62 | 2.98                   | 0.69 | 2.77                   | 0.72 |
| <b>Supplemental tests</b>                                                      |                        |      |                        |      |                        |      |
| Neuropsychological Assessment Battery, daily<br>living memory subtest          | 44.7                   | 4.2  | 44.6                   | 4.6  | 43.0                   | 4.7  |
| Brief Assessment of Cognition in Schizophrenia,<br>Tower of London subtest     | 16.9                   | 3.4  | 15.9                   | 4.2  | 15.4                   | 4.1  |
| Neuropsychological Assessment Battery, shape<br>learning subtest               | 19.4                   | 3.5  | 18.0                   | 3.6  | 16.9                   | 3.9  |

## **B. Expanded Results**

### *Age Effects, With Follow-Up Contrasts*

The one-way analyses of variance (ANOVAs) to assess age effects revealed a significant overall effect for six of the seven cognitive domains plus the overall composite score (see Figure 1 in the article; speed of processing:  $F=25.45$ ,  $df=2$ , 296,  $p<0.001$ ; attention/vigilance:  $F=5.39$ ,  $df=2$ , 293,  $p<0.005$ ; working memory:  $F=10.00$ ,  $df=2$ , 295,  $p<0.001$ ; visual learning:  $F=34.12$ ,  $df=2$ , 296,  $p<0.001$ ; reasoning and problem solving:  $F=34.54$ ,  $df=2$ , 295,  $p<0.001$ ; overall composite score:  $F=19.25$ ,  $df=2$ , 287,  $p<0.001$ ). The only cognitive domain that did not show a significant age effect was verbal learning, which revealed a nonsignificant trend in the expected direction ( $p=0.11$ ). The pattern of age effects was similar across cognitive domains, with the exception of social cognition. In general, younger participants performed better than older ones. For reasoning and problem solving, visual learning, speed of processing, and the overall composite score, each age group differed significantly from each other (younger > middle > older). For working memory, the younger and middle age groups performed better than the older age group but did not differ significantly from one another (younger, middle > older). This same pattern was observed for attention/vigilance, except that the difference between the middle and older age groups fell to the level of a nonsignificant trend ( $p=0.07$ ). For social cognition ( $F=4.56$ ,  $df=2$ , 294,  $p<.001$ ), the younger age group performed worse than the middle and older age groups, with the latter two groups not differing significantly from one another (younger < middle, older).

### *Gender Effects*

The analyses examining gender effects yielded a mixed pattern of results. Significant differences between men and women were observed in three of the seven cognitive domains (see Figure 2 in the article). Men performed better than women on the reasoning and problem solving and working memory measures ( $t=2.45$ ,  $df=296$ ,  $p<0.02$ , and  $t=3.09$ ,  $df=296$ ,  $p<0.01$ , respectively). Women performed better than men on the verbal learning measure ( $t=-2.05$ ,  $df=298$ ,  $p<0.05$ ). There were no statistically significant differences between men and women on the other four cognitive domains or the overall composite score.

### *Education Effects, With Follow-Up Contrasts*

Education effects were highly consistent across all cognitive domains. The one-way ANOVAs revealed a significant overall effect on all seven cognitive domains plus the overall composite score (see Figure 3 in the article; speed of processing:  $F=20.69$ ,  $df=2$ , 296,  $p<0.001$ ; attention/vigilance:  $F=31.17$ ,  $df=2$ , 293,  $p<0.001$ ; working memory:  $F=15.10$ ,  $df=2$ , 295,  $p<0.001$ ; verbal learning:  $F=14.65$ ,  $df=2$ , 297,  $p<0.001$ ; visual learning:  $F=13.92$ ,  $df=2$ , 296,  $p<0.001$ ; reasoning and problem solving:  $F=4.24$ ,  $df=2$ , 295,  $p<0.02$ ; social cognition:  $F=3.43$ ,  $df=2$ , 294,  $p<0.04$ ; overall composite score:  $F=22.31$ ,  $df=2$ , 287,  $p<0.001$ ). The pattern of performance differences was highly similar across cognitive domains, with higher test performance corresponding with higher levels of education. For speed of processing, attention/vigilance, verbal learning, visual learning, and the overall composite score, each educational group differed from one another (high > middle > low). For working memory, the same pattern was observed except that the difference between the low and middle education groups was a nonsignificant trend ( $p=0.12$ ). For reasoning and problem solving, the high education group performed better than the low and middle education groups, with the latter two groups not differing significantly from one another (high > middle, low). For social cognition, the high and middle education groups both performed better than the low education group but did not differ significantly from one another (high, middle > low).

## References

1. Army Individual Test Battery: Manual of Directions and Scoring. Washington, DC, War Department, Adjutant Generals Office, 1944
2. Keefe RSE: Brief Assessment of Cognition in Schizophrenia (BACS) Manual—A, version 2.1. Durham, NC, Duke University Medical Center, 1999
3. Brandt J, Benedict RHB: The Hopkins Verbal Learning Test—Revised: Professional Manual. Odessa, Fla, Psychological Assessment Resources, Inc, 2001
4. Wechsler D: Wechsler Memory Scale, 3rd ed. San Antonio, Tex, Psychological Corp, 1997
5. Gold JM, Carpenter C, Randolph C, Goldberg TE, Weinberger DR: Auditory working memory and Wisconsin Card Sorting Test performance in schizophrenia. *Arch Gen Psychiatry* 1997; 54:159–165
6. White T, Stern RA: Neuropsychological Assessment Battery: psychometric and technical manual. Lutz, Fla, Psychological Assessment Resources, Inc, 2003
7. Benedict RHB: Brief Visuospatial Memory Test—Revised: Professional Manual. Odessa, Fla, Psychological Assessment Resources, Inc, 1997
8. Spreen O, Strauss E: A Compendium of Neuropsychological Tests: Administration, Norms, and Commentary, 2nd ed. New York, Oxford University Press, 1998
9. Mayer JD, Salovey P, Caruso DR: Mayer-Salovey-Caruso Emotional Intelligence Test (MSCEIT) User's Manual. Toronto, Multi-Health System Publishers, 2002
10. Cornblatt BA, Risch NJ, Faris G, Friedman D, Erlenmeyer-Kimling L: The Continuous Performance Test, Identical Pairs Version (CPT-IP), I: new findings about sustained attention in normal families. *Psychiatr Res* 1988; 26:223–238
